# Supplementary material for: Working Memory-Related Neurofunctional Correlates Associated with the Frontal Lobe in Children with Familial vs. Non-Familial Attention Deficit/Hyperactivity Disorder
Source: MDPI journal article supplement (doi:10.3390/brainsci13101469), 2023-10-18
Supplement: s1 [file s1]

# Working Memory-related Neurofunctional Correlates associated with Frontal Lobe in Children with Familial vs. Non-Familial Attention Deficit/Hyperactivity Disorder

## Supplementary Materials

Supplementary Table S1. Group comparisons of the n-back task-performance measures (TDC: Typically developing children; ADHD: Attention deficit/hyperactivity disorder; ADHD-NF: Non-familial ADHD; ADHD-F: Familial ADHD; SD: Standard deviation).

| TDC vs ADHD         |                       |                        |                    |              |
|---------------------|-----------------------|------------------------|--------------------|--------------|
|                     | TDC<br>[Mean (SD)]    | ADHD<br>[Mean (SD)]    | t-statistic        | <i>p</i>     |
| Percentage accuracy |                       |                        |                    |              |
| 0-back              | 88.67 (8.48)          | 88.38 (8.89)           | t(344.438)=1.880 * | 0.061        |
| 2-back              | 79.648 (8.07)         | 80.43 (8.46)           | t(360)=1.704       | 0.089        |
| Mean reaction time  |                       |                        |                    |              |
| 0-back              | 891.83 (118.56)       | 869.21 (112.95)        | t(360)=0.779       | 0.437        |
| 2-back              | 995.86 (115.68)       | 971.79 (113.98)        | t(360)=1.525       | 0.128        |
| ADHD-F vs ADHD-NF   |                       |                        |                    |              |
|                     | ADHD-F<br>[Mean (SD)] | ADHD-NF<br>[Mean (SD)] | t-statistic        | <i>p</i>     |
| Percentage accuracy |                       |                        |                    |              |
| 0-back              | 88.87 (9.028)         | 87.95 (8.78)           | t(284)=0.876       | 0.382        |
| 2-back              | 81.59 (8.75)          | 79.39 (8.07)           | t(284)=2.216       | <b>0.027</b> |
| Mean reaction time  |                       |                        |                    |              |
| 0-back              | 875.08 (109.08)       | 863.95 (116.41)        | t(284)=0.832       | 0.406        |
| 2-back              | 972.63 (110.23)       | 971.05 (117.59)        | t(284)=0.117       | 0.907        |

\* Levene's test for homogeneity of variance (centered on mean) showed a significant difference in variance between the two groups. Bold p-values represent statistically significant group differences at  $\alpha < 0.05$ .

Supplementary Table S2. Working memory-related (2-0 condition) voxel-based brain activation group differences (cluster threshold  $> 1000$  voxels,  $\alpha \leq 0.001$ ; TDC: Typically developing children; ADHD: Attention deficit/hyperactivity disorder; ADHD-NF: non-Familial ADHD; ADHD-F: Familial ADHD; B/L: Bilateral).

| Brain regions (within the cluster)       | Cluster size<br>(in voxels) | <i>p</i>        | Contrast         |
|------------------------------------------|-----------------------------|-----------------|------------------|
| Left inferior frontal gyrus (triangular) | 4979                        | <b>1.72E-14</b> | TDC – ADHD       |
| Left inferior frontal gyrus (opercular)  |                             |                 |                  |
| Left precentral                          |                             |                 |                  |
| Right superior frontal                   | 2808                        | <b>1.57E-09</b> |                  |
| Right middle frontal                     |                             |                 |                  |
| B/L precuneus                            |                             |                 |                  |
| Left cuneus                              | 2157                        | <b>5.96E-08</b> |                  |
| Right middle occipital                   |                             |                 |                  |
| Right superior parietal                  |                             |                 |                  |
| Right inferior parietal                  | 1050                        | <b>2.11E-04</b> |                  |
| Right angular                            |                             |                 |                  |
| B/L postcentral                          |                             |                 |                  |
| B/L precentral                           | 11094                       | <b>1.60E-25</b> | ADHD – TDC       |
| Left rolandic operculum                  |                             |                 |                  |
| Right inferior temporal                  |                             |                 |                  |
| Right middle temporal                    | 9784                        | <b>1.79E-06</b> | ADHD-F – ADHD-NF |
| Right hippocampus                        |                             |                 |                  |

Left superior frontal gyrus, medial orbital  
Left anterior cingulate cortex, pregenual  
B/L superior frontal gyrus, medial

11412

**2.38E-07**

ADHD-NF – ADHD-F

Bold p-values represent statistically significant group differences.

Supplementary Table S3. ROI-based activation and laterality analyses (ROI: Region-of-interests; ANOVA: Analysis of variance; M: Mean; SD: Standard deviation; SFG: Superior frontal gyrus; MFG: Middle frontal gyrus; IFG: Inferior frontal gyrus; TDC: Typically developing children; ADHD: Attention deficit/hyperactivity disorder; ADHD-NF: non-Familial ADHD; ADHD-F: Familial ADHD; LI: Laterality index. Post-hoc t-test with Bonferroni corrections).

| Measure                  | One-way ANOVA |               |             |              |       |                  | Post-hoc independent samples t-test |                  |                 |                   |                  |       |
|--------------------------|---------------|---------------|-------------|--------------|-------|------------------|-------------------------------------|------------------|-----------------|-------------------|------------------|-------|
|                          | TDC           |               | ADHD-NF     | ADHD-F       | F(2)  | p                | TDC – ADHD-NF                       |                  | TDC – ADHD-F    |                   | ADHD-NF – ADHD-F |       |
|                          | Sample        | M (SD)        | M (SD)      | M (SD)       |       |                  | t-statistic                         | p                | t-statistic     | p                 | t-statistic      | p     |
| Left SFG mean activation | 1             | 1.28 (1.79)   | 1.08 (1.57) | 0.75 (1.51)  | 3.798 | <b>0.023</b>     | t(454)=1.287                        | 0.199            | t(438)=3.147    | <b>0.002</b>      | t(284)=1.771     | 0.078 |
|                          | 2             | 1.29 (1.63)   |             |              | 4.309 | <b>0.014</b>     |                                     |                  |                 |                   |                  |       |
|                          | 1             | 1.04 (1.61)   | 0.67 (1.43) | 0.61 (1.45)  | 3.597 | <b>0.028</b>     | t(454)=2.528                        | <b>0.012</b>     | t(438)=2.745    | <b>0.006</b>      | t(284)=0.302     | 0.763 |
|                          | 2             | 1.06 (1.55)   |             |              | 4.008 | <b>0.019</b>     |                                     |                  |                 |                   |                  |       |
| LI SFG                   | 1             | 0.03 (0.58)   | 0.11 (0.59) | 0.05 (0.56)  | 0.804 | 0.448            |                                     |                  |                 |                   |                  |       |
|                          | 2             | 0.09 (0.58)   |             |              | 0.466 | 0.628            |                                     |                  |                 |                   |                  |       |
| Left MFG mean activation | 1             | 0.78 (1.79)   | 0.62 (1.50) | 0.54 (1.43)  | 0.854 | 0.427            |                                     |                  |                 |                   |                  |       |
|                          | 2             | 0.95 (1.67)   |             |              | 2.960 | 0.053            |                                     |                  |                 |                   |                  |       |
|                          | 1             | 1.05 (1.86)   | 0.62 (1.81) | 0.61 (1.52)  | 2.998 | 0.051            |                                     |                  |                 |                   |                  |       |
|                          | 2             | 1.01 (1.83)   |             |              | 2.602 | 0.075            |                                     |                  |                 |                   |                  |       |
| LI MFG                   | 1             | -0.09 (0.57)  | 0.03 (0.63) | -0.05 (0.61) | 1.728 | 0.179            |                                     |                  |                 |                   |                  |       |
|                          | 2             | -0.003 (0.61) |             |              | 0.707 | 0.494            |                                     |                  |                 |                   |                  |       |
| Left IFG mean activation | 1             | 1.19 (1.73)   | 0.51 (1.59) | 0.51 (1.42)  | 9.174 | <b>&lt;0.001</b> | t(454)=3.665                        | <b>&lt;0.001</b> | t(299.75)=3.851 | <b>&lt;0.001*</b> | t(284)=-0.018    | 0.986 |
|                          | 2             | 1.02 (1.61)   |             |              | 5.474 | <b>0.004</b>     |                                     |                  |                 |                   |                  |       |
|                          | 1             | 1.04 (1.60)   | 0.42 (1.67) | 0.69 (1.73)  | 5.243 | <b>0.006</b>     | t(454)=4.011                        | <b>&lt;0.001</b> | t(438)=2.222    | 0.027             | t(284)=-1.344    | 0.180 |
|                          | 2             | 1.10 (1.58)   |             |              | 6.331 | <b>0.002</b>     |                                     |                  |                 |                   |                  |       |
| LI IFG                   | 1             | 0.03 (0.60)   | 0.01 (0.69) | -0.05 (0.64) | 0.700 | 0.497            |                                     |                  |                 |                   |                  |       |
|                          | 2             | -0.03 (0.66)  |             |              | 0.332 | 0.718            |                                     |                  |                 |                   |                  |       |

+ Levene's test for homogeneity of variance (centered on mean) showed a significant difference in variance between the two groups

Bold p-values represent statistically significant group differences.

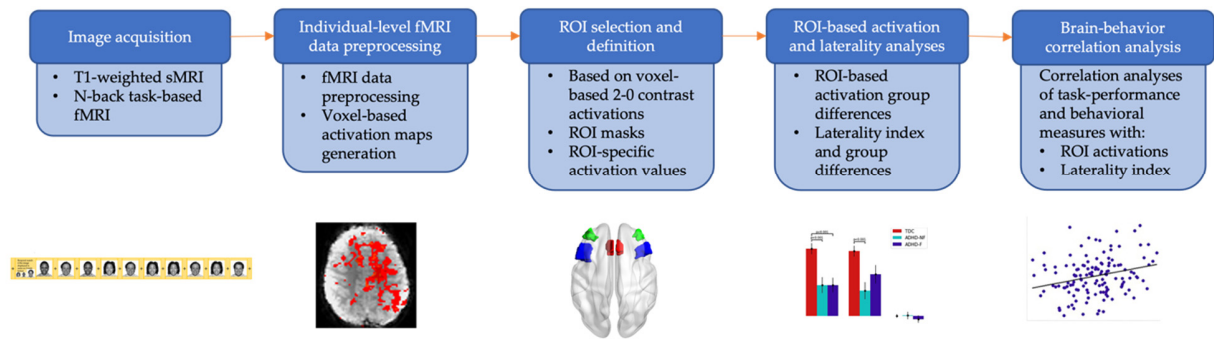

Supplementary Figure S1. Summary of steps in methodology (ADHD: Attention deficit/hyperactivity disorder; ADHD-NF: Non-familial ADHD; ADHD-F: Familial ADHD; ROI: Region-of-interest; fMRI: functional magnetic resonance imaging; sMRI: structural MRI).
